# Supplementary material for: Poly(phenylene sulfide sulfone) based membranes with improved stability for vanadium redox flow batteries
Source: Royal Society of Chemistry journal article supplement (doi:10.1039/c7ta03046k), 2017-01-01
Supplement: c7ta03046k1.pdf [file c7ta03046k1.pdf]

## Supporting Information

### Poly(phenylene sulfide sulfone) based membranes with improved stability for vanadium redox flow batteries

Mario Branchi, Matteo Gigli\*, Barbara Mecheri, Diana De Porcellinis, Silvia Licoccia and Alessandra D'Epifanio\*

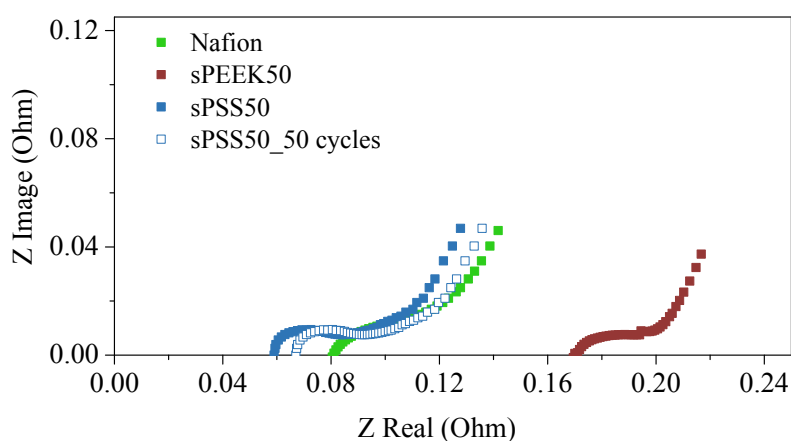

**Figure S1.** EIS curves of Nafion, sPEEK50, sPSS50 and sPSS50\_50 cycles.
